# Supplementary material for: Systematic Pan-cancer Analysis on the Expression and Role of RCC1/SNHG3/SNHG12
Source: Research Square preprint supplement (doi:10.21203/rs.3.rs-1426240/v1), 2022-03-15
Supplement: Supplementary file 1 [file 50ee5c7c0bfd6d674ff0fab8.docx]

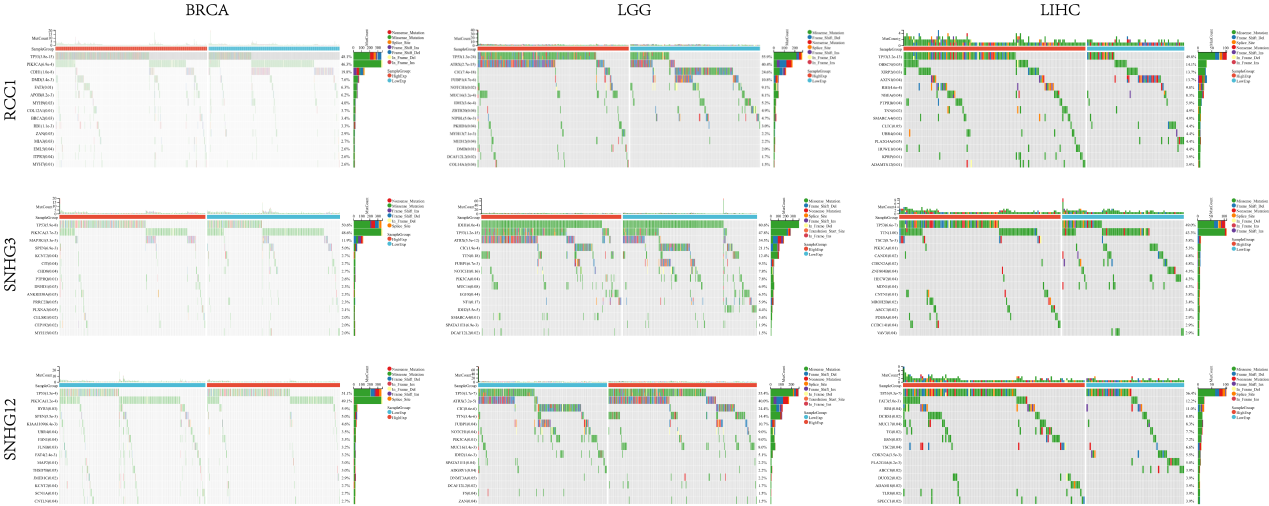


**Supplementary figure1.** Tumor mutation landscape of RCC1/SNHG3/SNHG12 EXP in BRCA/LGG/LIHC.


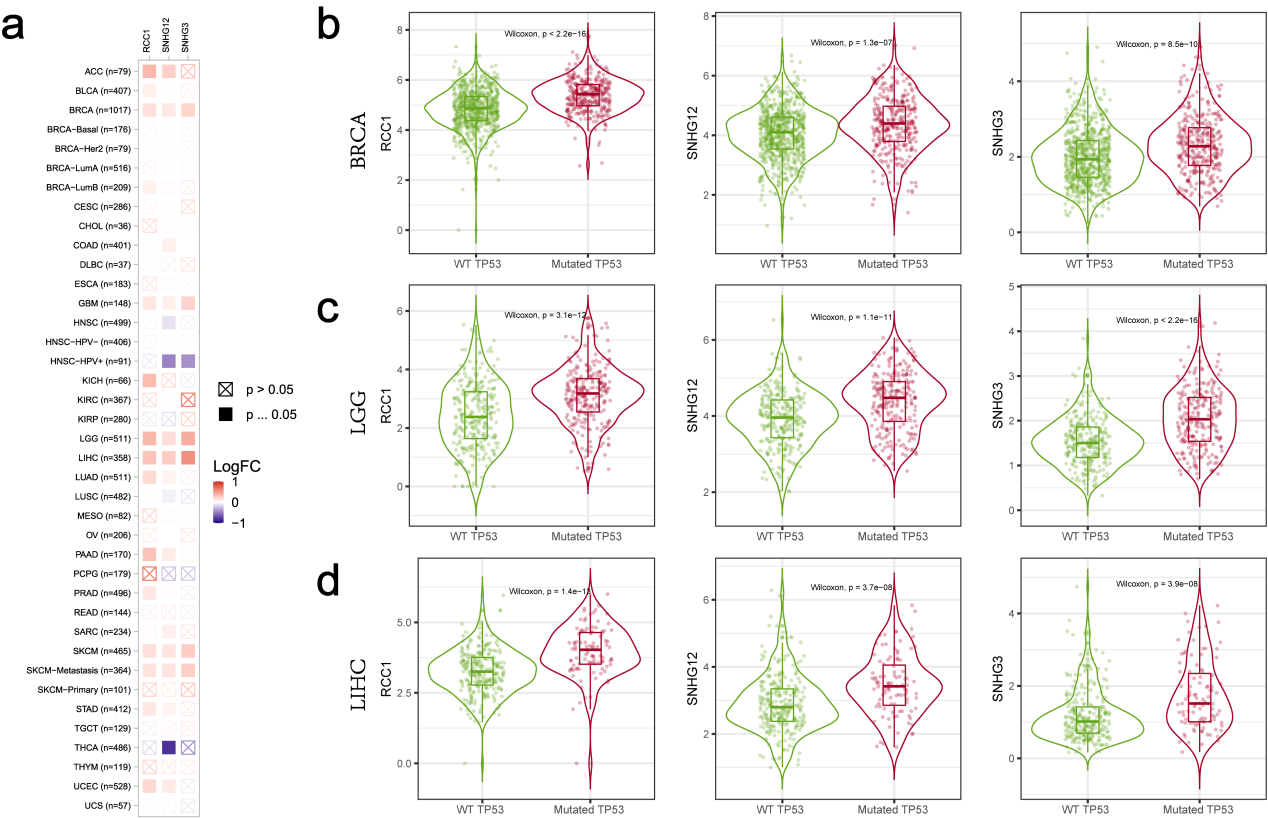


**Supplementary figure2.** Correlation between RCC1/SNHG3/SNHG12 and TP53 in cancers. (a) Correlation of RCC1/SNHG3/SNHG12 and TP53 expression in different cancers. (b-d) Differential expression of RCC1/SNHG3/SNHG12 in WT TP53 and Muted TP52 in BRCA, LGG and LIHC.


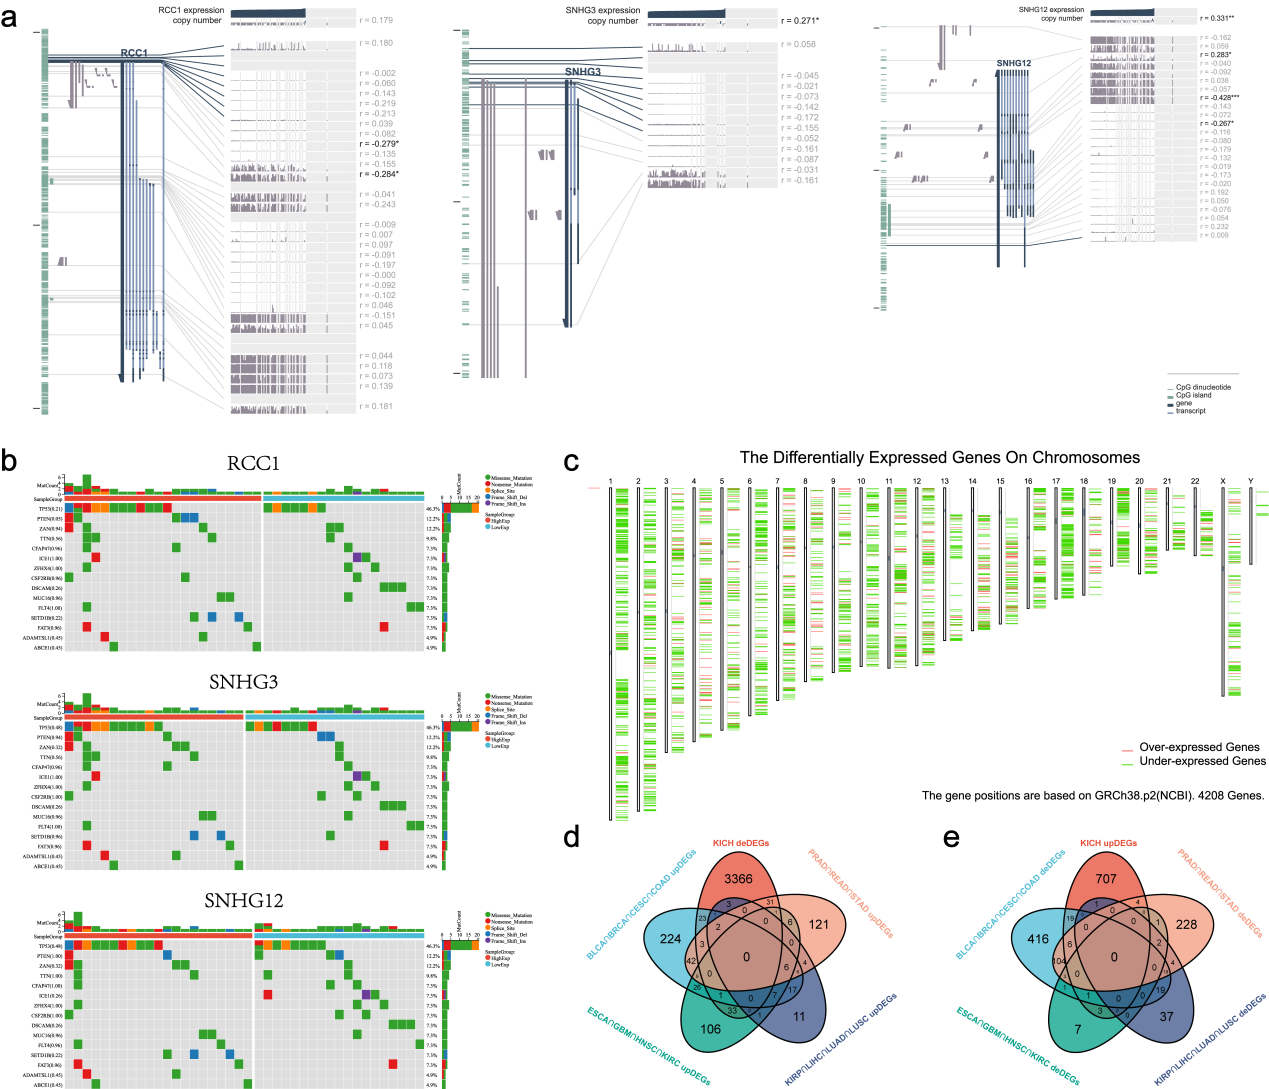


**Supplementary figure3.** Analysis of RCC1/SNHG3/SNHG12 in KICH. (a) Methylation of RCC1/SNHG3/SNHG12 in KICH. (b) Tumor mutation landscape of RCC1/SNHG3/SNHG12 EXP in KICH. (c) Overall differential genes in KICH tumors with their chromosomal distribution. (d-e) Venn diagram of KICH and other cancer differential genes.


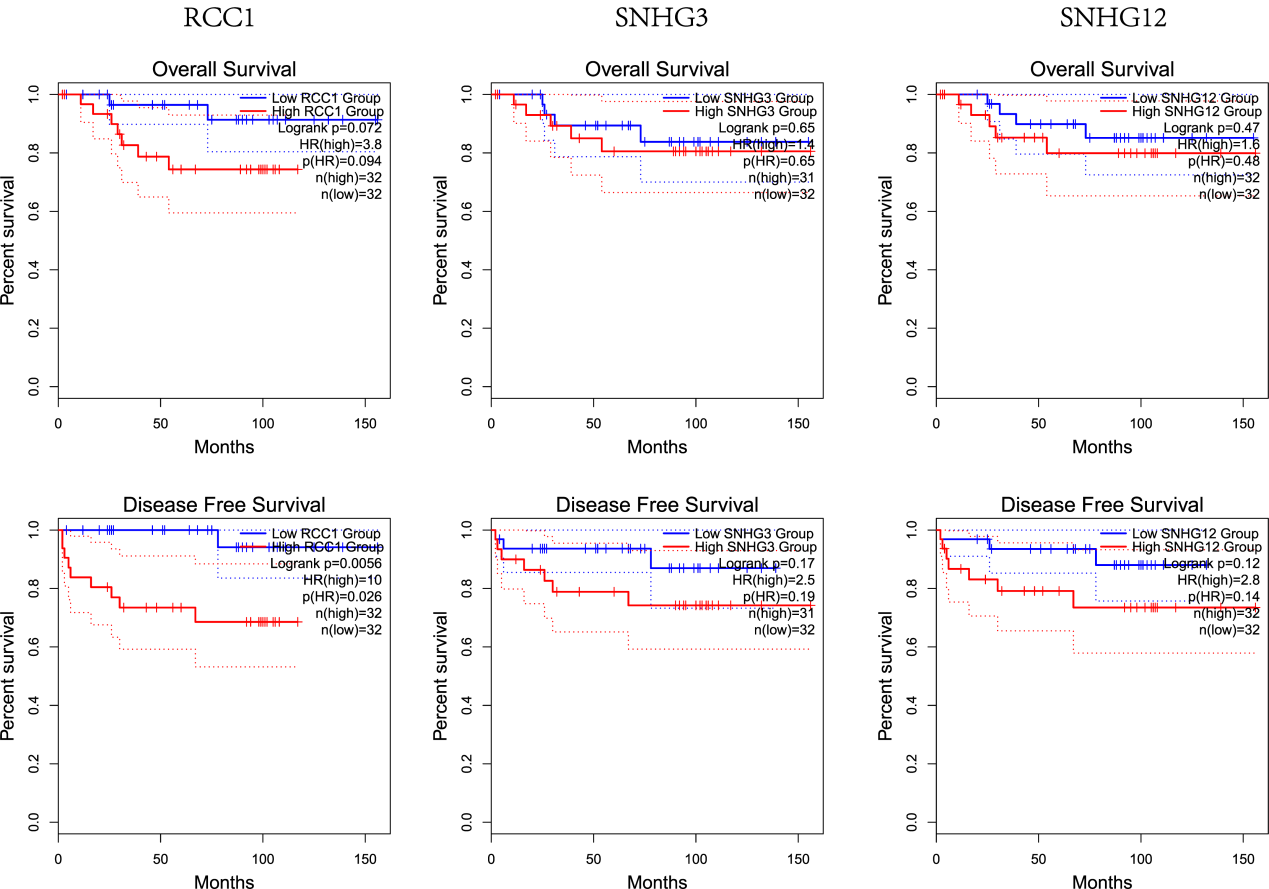


**Supplementary figure4.** OS and DFS of RCC1/SNHG3/SNHG12 in KICH.


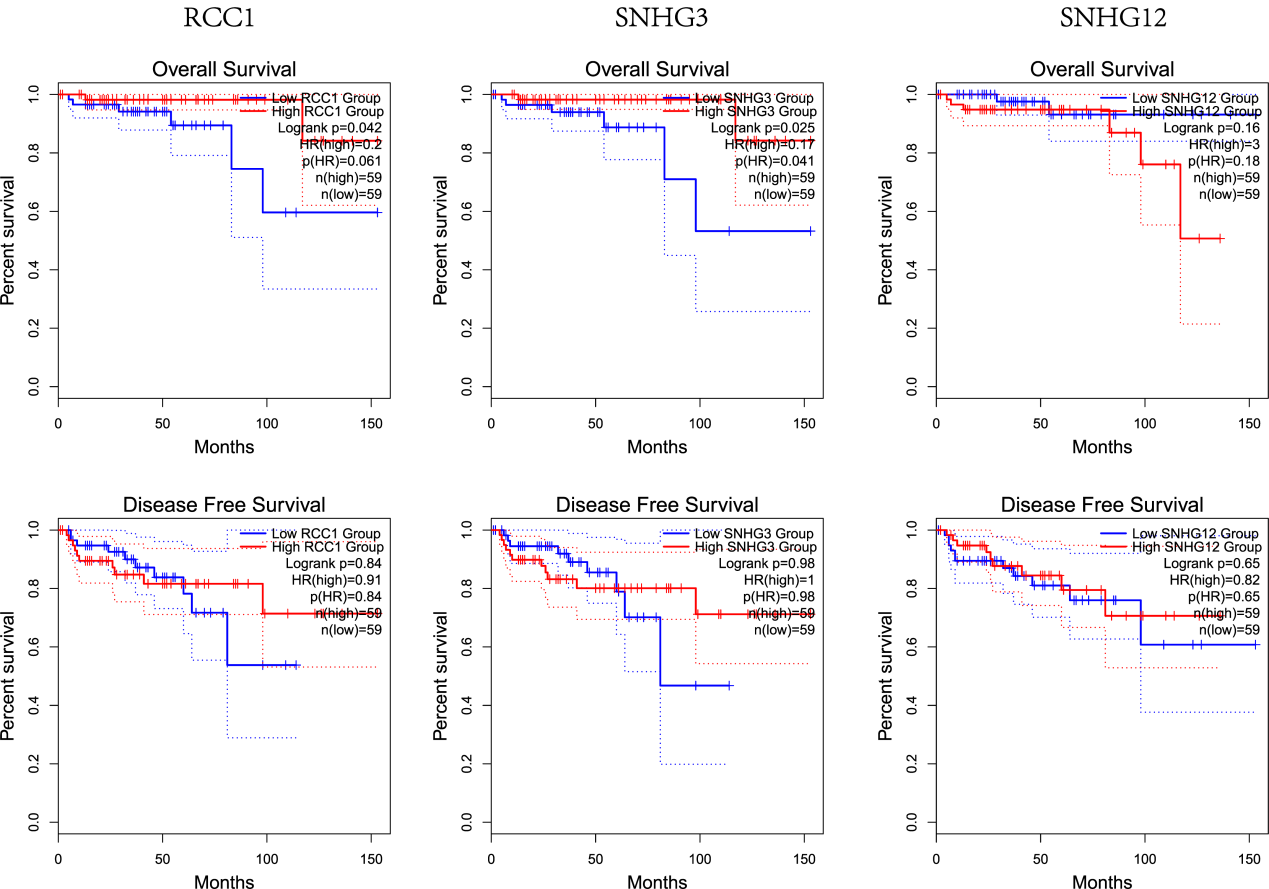


**Supplementary figure5.** OS and DFS of RCC1/SNHG3/SNHG12 in THYM.
